# Supplementary material
Source: Springer Nature journal article supplement (https://www.springermedizin.de/resource/supplementary/13046_2009_154_MOESM2_ESM.pdf/9661748)

**A**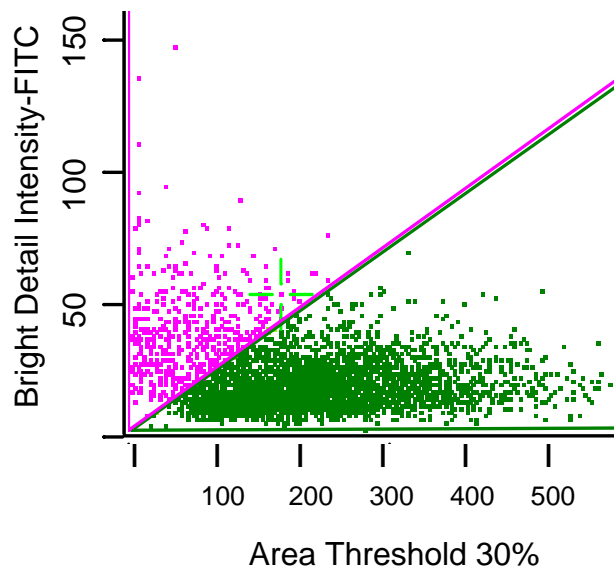**B**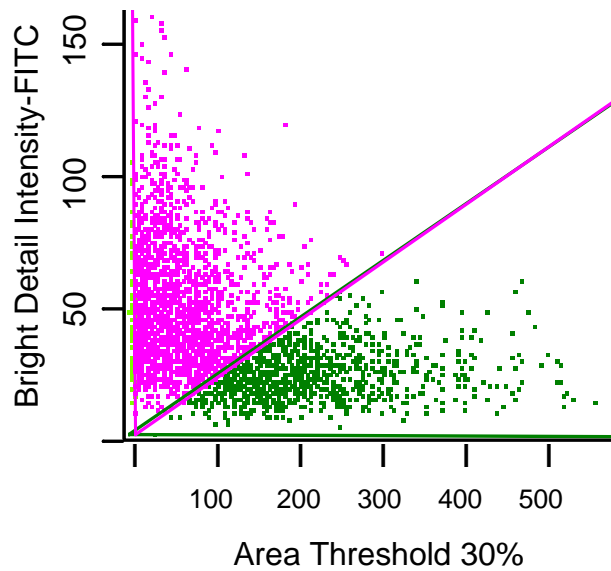**C****D****E**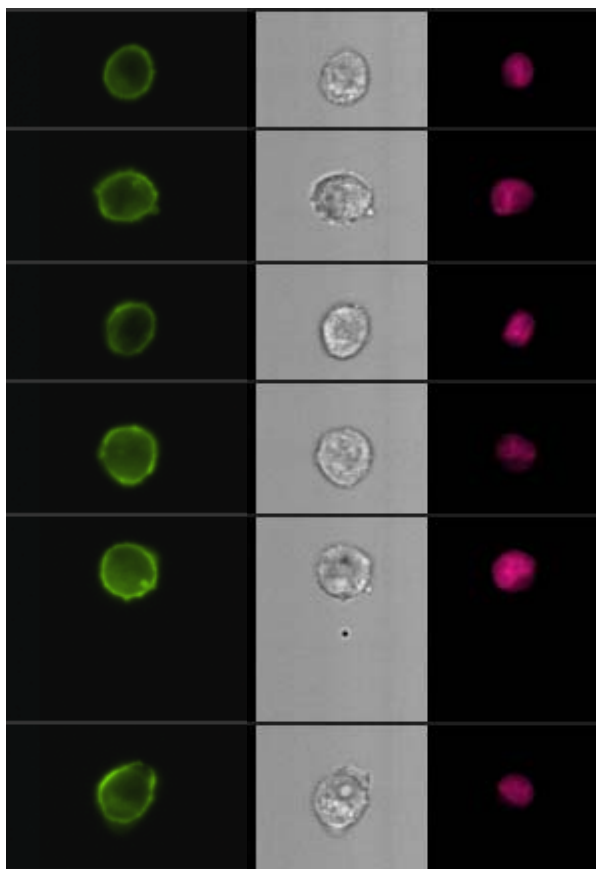**F****G****H**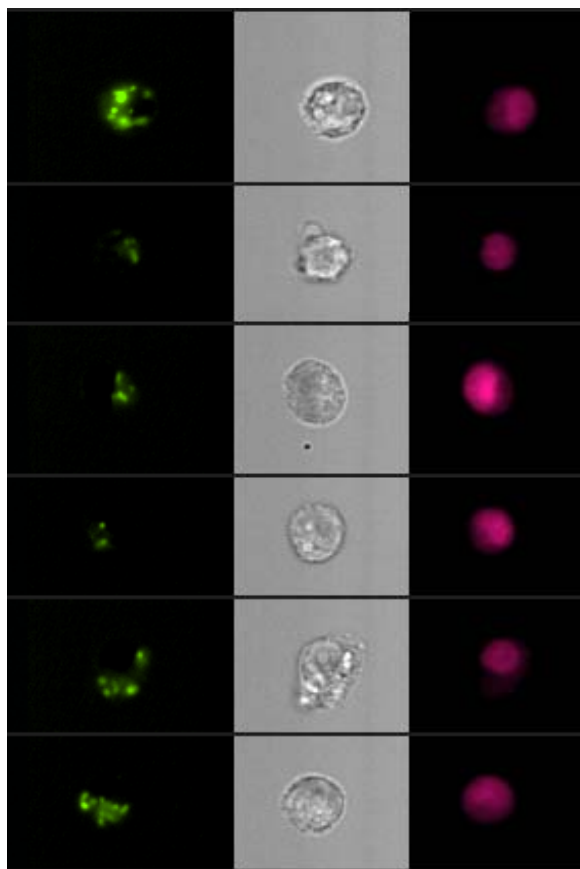

Supplement: MOESM2 [file 9661748]
